# Supplementary material for: Rational construction of spinel cobaltite/MXene composites towards superior interfacial charge dynamics for advanced pseudocapacitors
Source: Royal Society of Chemistry journal article supplement (doi:10.1039/d6ra02980a), 2026-04-24
Supplement: d6ra02980a1.pdf [file d6ra02980a1.pdf]

## Supporting Information

# Rational Construction of Spinel Cobaltite/MXene Composites towards Superior Interfacial Charge Dynamics for Advanced Pseudocapacitors

Komal Ali Rao<sup>1\*</sup>, Khizra Waheed<sup>1</sup>, Muhammad Waqas<sup>1</sup>, Muhammad Nokhiaz<sup>2</sup>, Muhammad Imran Khan<sup>3</sup>, Muhammad Bilal<sup>4</sup>, Zahra Bayhan<sup>5</sup>, Muhammad Ehsan Mazhar<sup>1</sup>

<sup>1</sup>*Institute of Physics Bahauddin Zakariya University, Multan-60800, Pakistan; email:*

[komalrao49@gmail.com](mailto:komalrao49@gmail.com)

<sup>2</sup>*Center for Advanced Studies in Physics Government College University, Lahore, Pakistan*

<sup>3</sup>*Research Institute of Sciences and Engineering (RISE), University of Sharjah, Sharjah 27272, United Arab Emirates*

<sup>4</sup>*School of Engineering and Materials Science, Queen Mary University of London-E1 4NS, UK;*

<sup>5</sup>*Department of Physics, College of Sciences, Princess Nourah bint Abdulrahman University, P.O. Box 84428, Riyadh 11671, Saudi Arabia*

## 1. Material Characterization

The structural characterization of the synthesized materials ( $\text{Nb}_2\text{CT}_x$  (MXene),  $\text{MgCo}_2\text{O}_4$  and  $\text{MgCo}_2\text{O}_4/\text{MXene}$ ) was conducted using an advanced X-ray diffractometer (Bruker-D8) equipped with a  $\text{CuK}\alpha$  radiation source ( $\lambda = 1.5407 \text{ \AA}$ ), operating at 40 kV and 35 mA. Data were collected over a  $2\theta$  range of  $20^\circ$ – $80^\circ$  with a scanning rate of  $1.5^\circ/\text{min}$ . Fourier Transform Infrared (FT-IR) spectroscopy was performed using a Thermo Scientific Nicolet 6700

spectrometer within the 400–4000  $\text{cm}^{-1}$  range (4  $\text{cm}^{-1}$  resolution, 256 scans) to qualitatively analyze the chemical composition and identify functional groups present in the composites. The surface morphology of the synthesized materials was examined using a scanning electron microscope (SEM, MAIA3 XMH, Model 2016). Electrochemical performance was evaluated via cyclic voltammetry (CV), galvanostatic charge-discharge (GCD), and electrochemical impedance spectroscopy (EIS) using a three-electrode setup on a Metrohm Autolab 302-N electrochemical workstation. All electrochemical measurements were carried out at room temperature in a 3M KOH aqueous electrolyte, with instrument control and data acquisition managed through Nova 2.1 software.

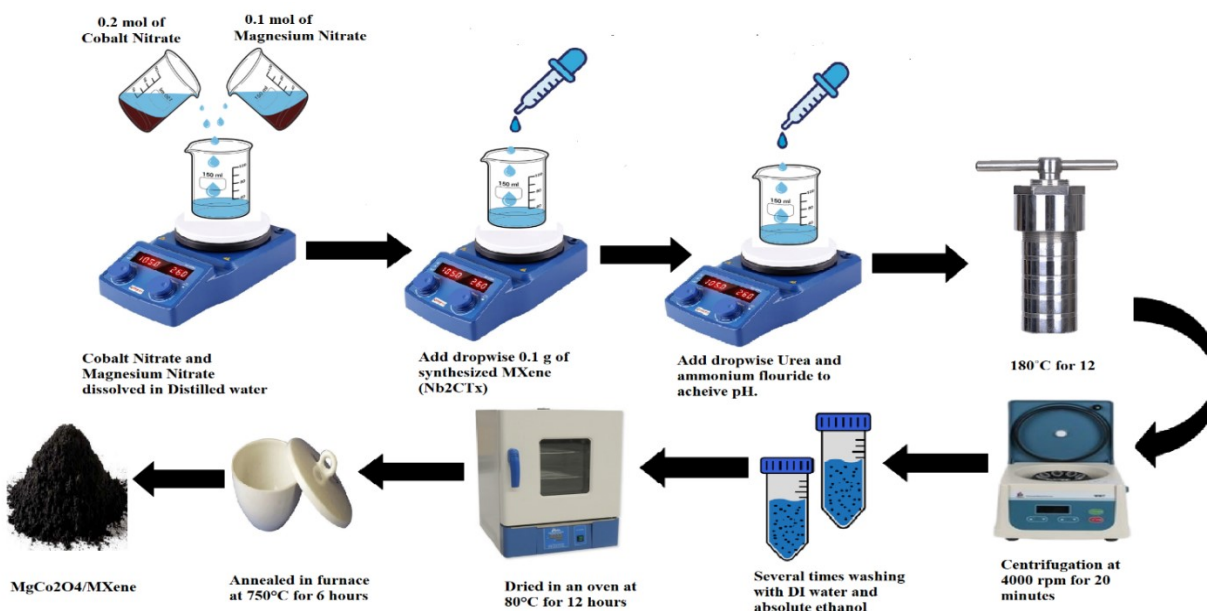

**Figure S1.** Hydrothermal synthesis of nanocomposite MgCo<sub>2</sub>O<sub>4</sub>/MXene

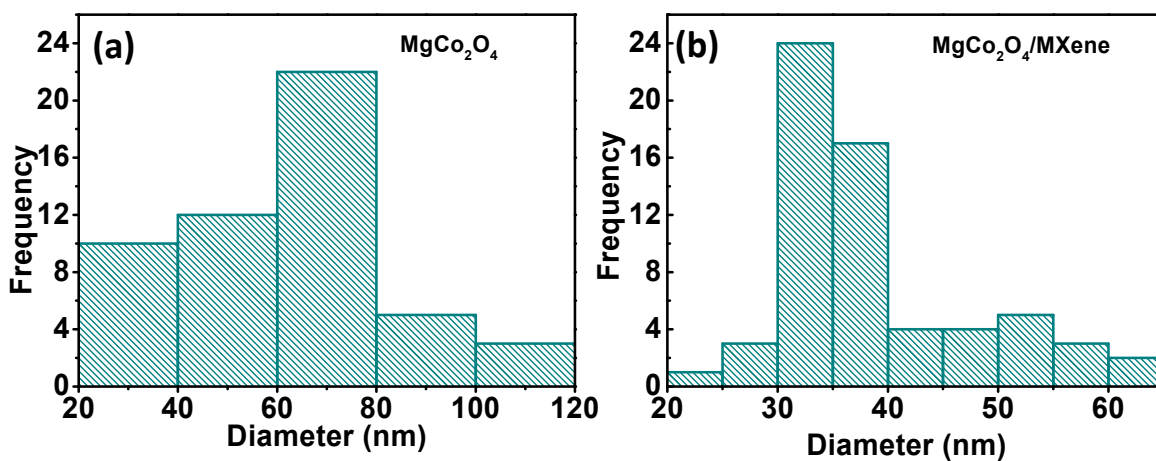

Figure S2. Histogram representing average diameter of nanocomposites MgCo<sub>2</sub>O<sub>4</sub> and MgCo<sub>2</sub>O<sub>4</sub>/MXene

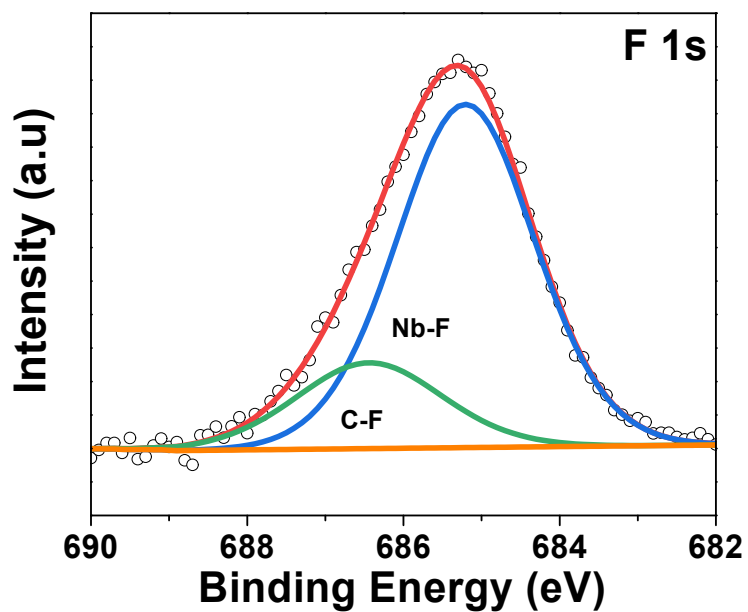

Figure S3. High resolution spectrum of F 1s from MgCo<sub>2</sub>O<sub>4</sub>/MXene composites

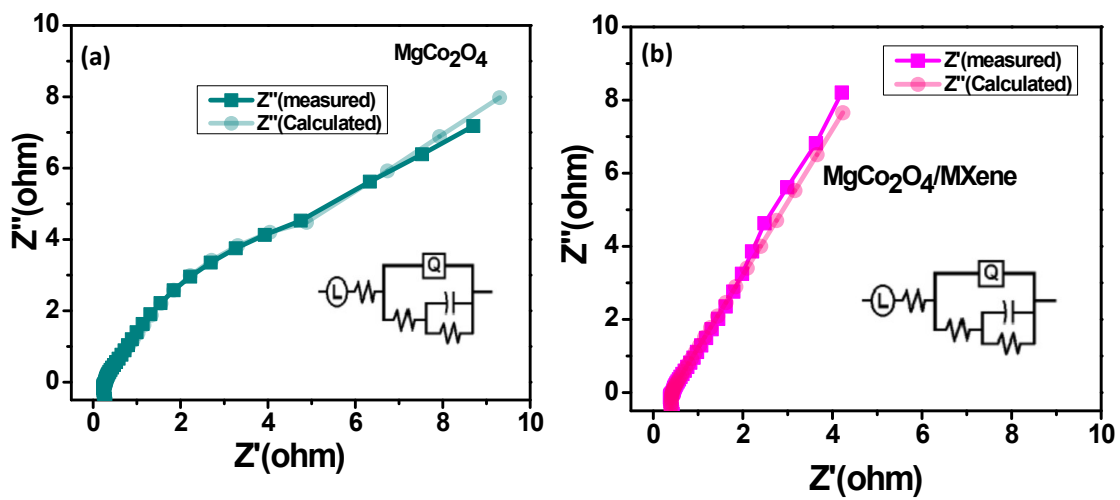

**Figure S4.** (a) & (b) Fitted plot of  $MgCo_2O_4$  and  $MgCo_2O_4/MXene$  using Zsimpwim software

**Table S1** Specific capacitance calculated from GCD of MgCo<sub>2</sub>O<sub>4</sub>/MXene

| <b>Sr. No</b> | <b>Current density (F/g)</b> | <b>Potential Window (<math>\Delta V</math>)</b> | <b>Discharge time (dt)</b> | <b>Specific Capacitance of MgCo<sub>2</sub>O<sub>4</sub>/MXene (Fg<sup>-1</sup>)</b> |
|---------------|------------------------------|-------------------------------------------------|----------------------------|--------------------------------------------------------------------------------------|
| 1             | 1                            | 0.6                                             | 595.78                     | 1257.75                                                                              |
| 2             | 2                            | 0.6                                             | 312.06                     | 1040.2                                                                               |
| 3             | 3                            | 0.6                                             | 159.96                     | 879.78                                                                               |
| 4             | 5                            | 0.6                                             | 90.95                      | 803.39                                                                               |
| 5             | 7                            | 0.6                                             | 60.29                      | 703.3                                                                                |
| 6             | 10                           | 0.6                                             | 40.5                       | 675                                                                                  |
